# Supplementary material for: Saccharomyces cerevisiae Tti2 Regulates PIKK Proteins and Stress Response
Source: PubMed Central journal article supplement (PMC4889661; doi:10.1534/g3.116.029520), 2016-04-05
Supplement: supp_g3.116.029520_FigureS1.pdf [file supp_g3.116.029520_FigureS1.pdf]

Sequence of oligonucleotide to integrate C-terminal TTI2 Myc<sup>9</sup>-tag.

```

      XbaI   SphI
GCTCTAGAGCATGCGACATTTTATCATTAAATTCTAGTTACATACGATAAGTGTTCGCAAGAGGATGCGTTGAACGAAT
CAATACTACAACAATGTAAGGAAACGATAAGCTGGTTGCTGAATTGTGACTGCGCTATGGGTGAACAGTTATCGACT
CTATCTAAGCAACCGCGGTTTC
      Sall   HindIII   NotI
AGTTACTTTTTGAGTTCTCAGTCGACAAGCTTGGAACCGCGGCCGCCTTCTCATAGTCTAGGATAGAGACACAGAC
ACAGACAAATGCATATACATATATATATATACTAGAC
      BamHI
AGTATATAAACAAAAAGAGTTATTTGGATCCCTTTATGCTGAAGAATCCCTTTTAAAGAAACCTTGGACATATATAAAA
TATTCATTGCTTATTTACAGATATATTAAGGTAAAGAGAATAATGACTCGGAGAGATAAATCGGTTTCATATTAACGGG
TGTTTTGCAACCCGTTACAATCCTGATATTAGTATCCAAAAACCGATTCACACAGTTAGACAAACATTGCTCTTC
      SacI   EcoRI
TTGCGAGCTCGAATTCAC
```

**Figure S1.** Sequence of the DNA used to integrate a C-terminal Myc<sup>9</sup>-tag into TTI2.
