# Supplementary material for: Saccharomyces cerevisiae Tti2 Regulates PIKK Proteins and Stress Response
Source: PubMed Central journal article supplement (PMC4889661; doi:10.1534/g3.116.029520), 2016-04-05
Supplement: supp_g3.116.029520_FigureS5.pdf [file supp_g3.116.029520_FigureS5.pdf]

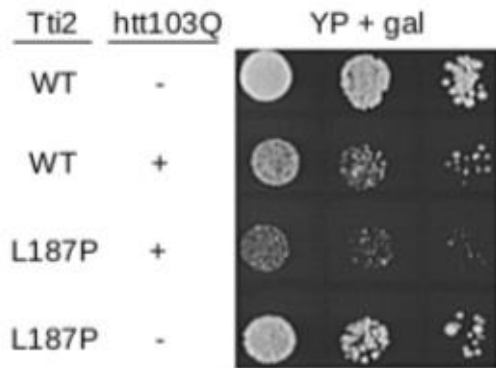

**Figure S5.** Synthetic slow growth due to exon 1 of the human *Huntingtin* gene containing a 103 residue polyQ sequence. The wild-type (CY6857) and *titi2*<sub>L187P</sub> (CY6872) strains were transformed with YCplac33 or *CEN-GAL1-htt103Q*, and grown to stationary phase in minimal medium containing 2% glucose and lacking uracil. Cell densities were normalized then cells spotted in 10-fold serial dilutions onto a YP plate containing 2% galactose and grown at 30° for two days.
