# Supplementary material for: Saccharomyces cerevisiae Tti2 Regulates PIKK Proteins and Stress Response
Source: PubMed Central journal article supplement (PMC4889661; doi:10.1534/g3.116.029520), 2016-04-05
Supplement: supp_g3.116.029520_FigureS6.pdf [file supp_g3.116.029520_FigureS6.pdf]

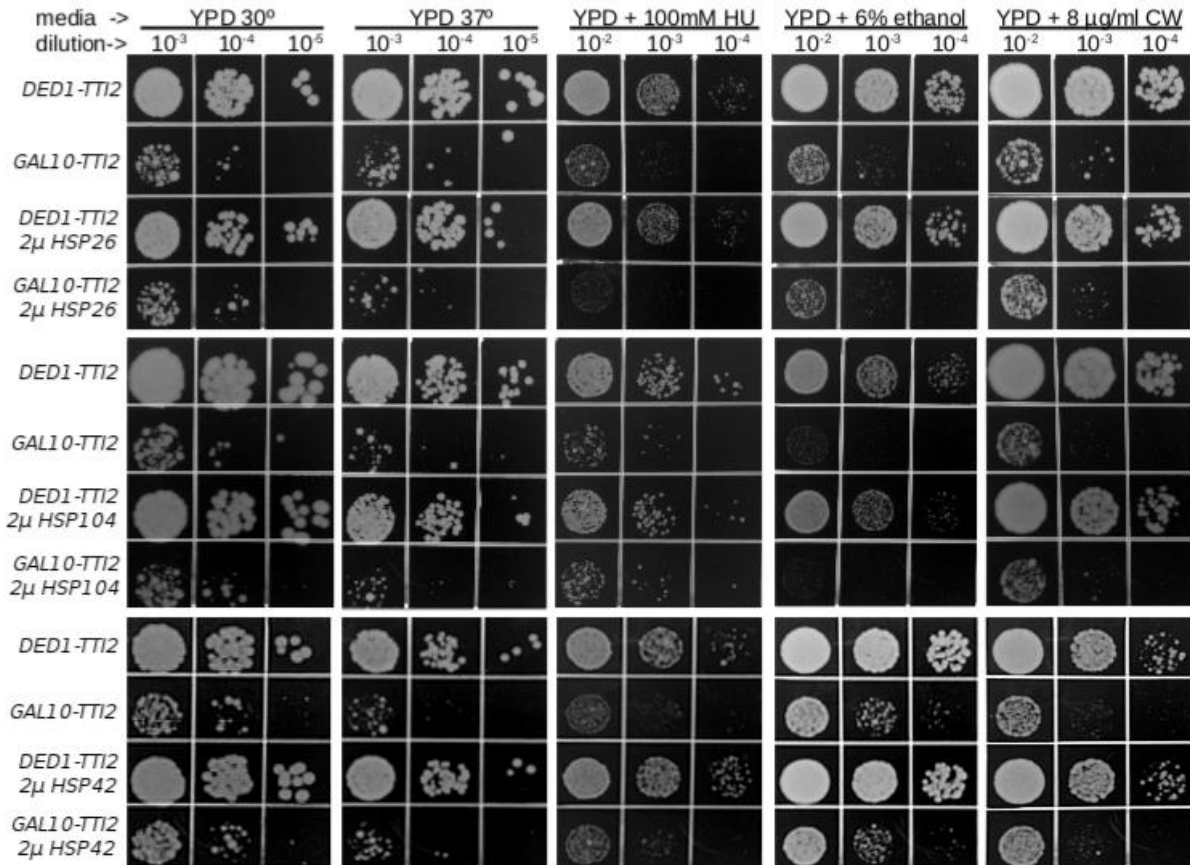

**Figure S6.** Overexpression of HSP26, HSP104 or HSPHSP42 does not compensate for depleting *Tti2*. Strains CY7245 (*DED1-TTI2* YCplac33), CY7249 (*GAL10-TTI2* YCp33), CY7247 (*DED1-TTI2* 2µ-GPD-HSP26), CY7251 (*GAL10-TTI2* 2µ-GPD-HSP26), CY7248 (*DED1-TTI2* 2µ-GPD-HSP104), CY7252 (*GAL10-TTI2* 2µ-GPD-HSP104), CY7323 (*DED1-TTI2* 2µ-HSP42-HSP42), and CY7324 (*GAL10-TTI2* 2µ-HSP42-HSP42) were grown to stationary phase in medium lacking uracil and containing raffinose. Cell densities were normalized and then 10-fold serial dilutions spotted onto YPD plates grown at either 30° or 37°, and onto YPD plates containing 6% ethanol, 8 µg/ml Calcofluor white, or 100 mM hydroxyurea.
