# Supplementary material for: Saccharomyces cerevisiae Tti2 Regulates PIKK Proteins and Stress Response
Source: PubMed Central journal article supplement (PMC4889661; doi:10.1534/g3.116.029520), 2016-04-05
Supplement: supp_g3.116.029520_TableS1.pdf [file supp_g3.116.029520_TableS1.pdf]

**Table S1.** Strains used in this study.

| <b>Strain</b> | <b>Genotype</b>                                                                   | <b>Plasmid (plasmid-promoter-gene)</b>        | <b>Reference</b>               |
|---------------|-----------------------------------------------------------------------------------|-----------------------------------------------|--------------------------------|
| BY4741        | <i>MATa his3Δ0 leu2Δ0 Δmet15 ura3Δ0</i>                                           |                                               | (Winzeler and Davis 1997)      |
| BY4742        | <i>MATa his3Δ0 leu2Δ0 lys2Δ0 ura3Δ0</i>                                           |                                               | (Winzeler and Davis 1997)      |
| BY4743        | <i>MATa/α his3Δ1/his3Δ1 leu2Δ0/leu2Δ0 LYS2/lys2Δ0 met15Δ0/MET15 ura3Δ0/ura3Δ0</i> |                                               | (Winzeler and Davis 1997)      |
| CY1217        | <i>MATa his3Δ0 leu2Δ0 Δmet15 ura3Δ0 Δire1::kanMX</i>                              |                                               | (Tong <i>et al.</i> 2001)      |
| CY5857        | <i>mec2-1</i>                                                                     |                                               | (Weinert <i>et al.</i> , 1994) |
| CY5919        | <i>MATa his3Δ0 leu2Δ0 ura3Δ0 URA3-Flag<sup>5</sup>-TRAI</i>                       |                                               | (Genereaux <i>et al.</i> 2012) |
| CY5998        | Isogenic to BY4742 except <i>URA3-eGFP-TRAI</i>                                   |                                               | (Genereaux <i>et al.</i> 2012) |
| CY6032        | Isogenic to BY4743 except <i>tti2Δ-met5Δ::TnI0luk</i>                             |                                               | This work                      |
| CY6049        | <i>MATa his3Δ0 leu2Δ0 met5Δ0 ura3Δ0 tti2Δ-met5Δ::TnI0luk</i>                      | YCplac111- <i>DED1-TTI2</i>                   | This work                      |
| CY6070        | <i>MATa his3Δ0 leu2Δ0 met5Δ0 ura3Δ0 tti2Δ-met5Δ::TnI0luk</i>                      | YCplac33- <i>DED1-TTI2</i>                    | This work                      |
| CY6194        | <i>MATa his3Δ0 leu2Δ0 ura3Δ0 URA3-Flag<sup>5</sup>-MEC1</i>                       |                                               | (DaSilva <i>et al.</i> 2013)   |
| CY6306        | <i>MATa ura3Δ0 his3Δ0 leu2Δ0 URA3-eGFP-MEC1</i>                                   |                                               | (DaSilva <i>et al.</i> 2013)   |
| CY6415        | Isogenic to BY4743 except <i>TOR1/URA3-Flag<sup>5</sup>-TOR1</i>                  |                                               | This work                      |
| CY6767        | Spore colony of CY4162 <i>MATa his3Δ0 leu2Δ0 tel2Δ::KanMX</i>                     | YCplac33- <i>DED1-TEL2</i>                    | This work                      |
| CY6857        | Isogenic to CY6070                                                                | YCplac111- <i>DED1-TTI2</i>                   | This work                      |
| CY6872        | Isogenic to CY6070                                                                | YCplac111- <i>DED1-tti2<sub>LI87P</sub></i>   | This work                      |
| CY6874        | Isogenic to CY6070                                                                | YCplac111- <i>DED1-tti2<sub>Q276TAA</sub></i> | This work                      |
| CY6963        | <i>MATa his3Δ0 leu2Δ0 ura3Δ0 tti2Δ-met5Δ::TnI0luk</i>                             | YCplac33- <i>DED1-TTI2</i>                    | This work                      |
| CY6971        | Isogenic to CY6070                                                                | YCplac111- <i>GALI0-TTI2</i>                  | This work                      |

|        |                                                                        |                                           |           |
|--------|------------------------------------------------------------------------|-------------------------------------------|-----------|
| CY6973 | Isogenic to CY6070                                                     | YCplac111- <i>GAL10-TTI2-leu2Δ0::URA3</i> | This work |
| CY6991 | Isogenic to CY6070                                                     | YEplac181- <i>GAL10-TTI2</i>              | This work |
| CY6999 | Isogenic to CY6971 except <i>URA3-Flag<sup>5</sup>-TRA1</i>            | YCplac111- <i>GAL10-TTI2</i>              | This work |
| CY7000 | Diploid of CY6971 and CY6963                                           | YCplac111- <i>GAL10-TTI2</i>              | This work |
| CY7030 | Isogenic to CY6971 except <i>URA3-Flag<sup>5</sup>-MEC1</i>            | YCplac111- <i>GAL10-TTI2</i>              | This work |
| CY7035 | Diploid of CY6963 x CY6965 with <i>TOR1/URA3-Flag<sup>5</sup>-TOR1</i> | YCplac111- <i>GAL10-TTI2</i>              | This work |
| CY7086 | Isogenic to BY4742 except <i>TTI2-Myc<sup>9</sup>-HIS3</i>             |                                           | This work |
| CY7172 | Isogenic to CY6971                                                     | YCplac33- <i>TTI2-TTI2</i>                | This work |
| CY7189 | Isogenic to CY6971 except <i>URA3-eGFP-MEC1</i>                        | YCplac111- <i>GAL10-TTI2</i>              | This work |
| CY7193 | Isogenic to CY6971 except <i>URA3-eGFP-TRA1</i>                        | YCplac111- <i>GAL10-TTI2</i>              | This work |
| CY7236 | Isogenic to CY6857                                                     | <i>2μ URA3 GAL1-FLAG-htt25Q</i>           | This work |
| CY7237 | Isogenic to CY6857                                                     | <i>2μ URA3 GAL1-FLAG-htt25Q</i>           | This work |
| CY7238 | Isogenic to CY6872                                                     | <i>2μ URA3 GAL1-FLAG-htt103Q</i>          | This work |
| CY7239 | Isogenic to CY6872                                                     | <i>2μ URA3 GAL1-FLAG-htt103Q</i>          | This work |
| CY7241 | Isogenic to CY6872                                                     | YCplac33                                  | This work |
| CY7245 | Isogenic to CY6857                                                     | YCplac33                                  | This work |
| CY7247 | Isogenic to CY6857                                                     | <i>2μ URA3 GPD-HSP26</i>                  | This work |
| CY7248 | Isogenic to CY6857                                                     | <i>2μ URA3 GPD-HSP104</i>                 | This work |
| CY7249 | Isogenic to CY6971                                                     | YCplac33                                  | This work |
| CY7251 | Isogenic to CY6971                                                     | <i>2μ URA3 GPD-HSP26</i>                  | This work |
| CY7252 | Isogenic to CY6971                                                     | <i>2μ URA3 GPD-HSP104</i>                 | This work |
| CY7323 | Isogenic to CY6857                                                     | <i>2μ URA3 HSP42-HSP42</i>                | This work |
| CY7324 | Isogenic to CY6971                                                     | <i>2μ URA3 HSP42-HSP42</i>                | This work |
| CY7370 | Isogenic to CY6070                                                     | <i>2μ LEU2 GPD-CDC37</i>                  | This work |
| CY7371 | Isogenic to CY6070                                                     | <i>2μ LEU2 GPD-HSP82</i>                  | This work |
| CY7372 | Isogenic to CY6070                                                     | <i>2μ LEU2 GPD-AHA1</i>                   | This work |
| CY7373 | Isogenic to CY6070                                                     | <i>2μ LEU2 GPD-HSC82</i>                  | This work |
| CY7374 | Isogenic to CY6973                                                     | <i>2μ LEU2 GPD-CDC37</i>                  | This work |
| CY7375 | Isogenic to CY6973                                                     | <i>2μ LEU2 GPD-HSP82</i>                  | This work |
| CY7376 | Isogenic to CY6973                                                     | <i>2μ LEU2 GPD-AHA1</i>                   | This work |
| CY7377 | Isogenic to CY6973                                                     | <i>2μ LEU2 GPD-HSC82</i>                  | This work |
