# Supplementary material for: Saccharomyces cerevisiae Tti2 Regulates PIKK Proteins and Stress Response
Source: PubMed Central journal article supplement (PMC4889661; doi:10.1534/g3.116.029520), 2016-04-05
Supplement: supp_g3.116.029520_TableS2.pdf [file supp_g3.116.029520_TableS2.pdf]

**Table S2.** Oligonucleotides used in this study.

| Name   | Sequence (5'-3')                                        | Description              |
|--------|---------------------------------------------------------|--------------------------|
| 2764-1 | AACTGCAGTAATACGCTTAACTGCTC                              | <i>GAL10</i><br>promoter |
| 2764-2 | CCCAAGCTTGACGTAAAGTATAGAGGT                             | <i>GAL10</i><br>promoter |
| 4213-1 | GGCCGACTACAAGGACGACGATGACAAGGC                          | Flag tag                 |
| 4213-2 | GGCCGCCTTGTCATCGTCGTCCTTG TAGTC                         | Flag tag                 |
| 5693-1 | ATAAGAATGCGGCCGCAATGACGGCCGTA ACTGATATC                 | <i>TTI2</i>              |
| 5693-2 | ATACGAGCTCTGCATTTGTCTGTGTCTGTGT                         | <i>TTI2</i>              |
| 6085-1 | CCTGTCACCATATGACGCGG                                    | <i>TTI2</i>              |
| 6085-2 | CAGGATCCACTACCTGCTCGATGTTCC                             | <i>TTI2</i>              |
| 6085-3 | GGGGATCCGGAAACGATAAGCTGGTTGC                            | <i>TTI2</i>              |
| 6085-4 | GGTTGGTCGACGGGATTCTTCAGCATAAAGGG                        | <i>TTI2</i>              |
| 6496-1 | ACATGCATGCTACTAAAGCCTCATTTC CAA                         | <i>TOR1</i>              |
| 6496-2 | CCCAAGCTTAAACAATCCCGCTGTTGT                             | <i>TOR1</i>              |
| 6496-3 | ATAAGAATGCGGCCGCTATGGAACCGCATGAGGAGC                    | <i>TOR1</i>              |
| 6496-4 | ACGCGTCGACAATTCATGTTCCAAGGA                             | <i>TOR1</i>              |
| TD0569 | GCCAAGCTTATATTTTGTATATGATTTTATTCTTCACC                  | <i>TTI2</i> promoter     |
| TD0570 | TGGTAAAGCTTCACATACTTATAACTTGATGC                        | <i>TTI2</i> promoter     |
| MD11   | GGGGACAAGTTTGTACAAAAAAGCAGGCTATGGCCATTGATTACTCTAAGTGG   | <i>CDC37</i>             |
| MD12   | GGGGACCACTTTGTACAAGAAAGCTGGGTCTAGTCAACAGTGTCGGCAGTATG   | <i>CDC37</i>             |
| MD13   | GGGGACAAGTTTGTACAAAAAAGCAGGCTATGGCTAGTGA AACTTTTGAATTTC | <i>HSP82</i>             |
| MD14   | GGGGACCACTTTGTACAAGAAAGCTGGGTCTAATCTACCTCTCCATTTCGGT    | <i>HSP82</i>             |
| MD15   | GGGGACAAGTTTGTACAAAAAAGCAGGCTATGGTCGTGAA TAACCCAAATAAC  | <i>AHA1</i>              |
| MD16   | GGGGACCACTTTGTACAAGAAAGCTGGGTTTATAATACGGCACCAAAGCC      | <i>AHA1</i>              |
| MD17   | GGGGACAAGTTTGTACAAAAAAGCAGGCTATGGCTGGTGA AACTTTTGAA     | <i>HSC82</i>             |

|        |                                                          |              |
|--------|----------------------------------------------------------|--------------|
| MD18   | GGGGACCACTTTGTACAAGAAAGCTGGGTTTAATCAACTTC<br>TTCCATCTCGG | <i>HSC82</i> |
| TK7578 | AAGGAAAAAAGCGGCCGCTTCCAAATTTTAATATTTAGCT<br>GGG          | <i>HSP42</i> |
| TK7589 | CCCGAGCTCTCGTTGTATGATTTTTGTGTGGT                         | <i>HSP42</i> |
